# Supplementary material for: Single-Cell DNA Sequencing Reveals an Evolutionary Pattern of CHIP in Transplant Eligible Multiple Myeloma Patients
Source: MDPI journal article supplement (doi:10.3390/cells13080657), 2024-04-09
Supplement: s1 [file s1]

# Supplementary Figures

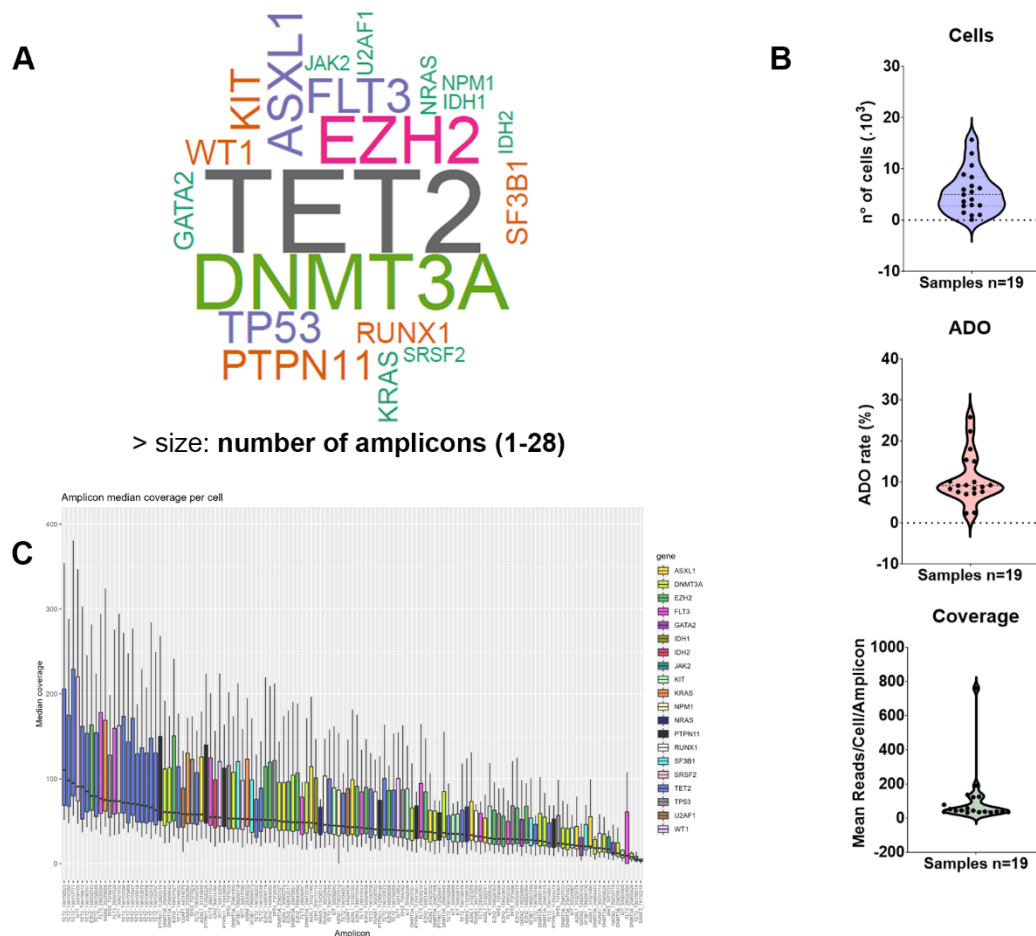

**Supplementary Figure 1**

**Supplementary Figure S1. Single-cell DNA panel coverage and metrics of patient samples processed with the Tapestry platform for single-cell DNA sequencing.** (A) The 20 genes included in the 127-amplicon panel, which covers reported mutational hotspots (SNVs and small indels) in acute myeloid leukemia. The text size is proportional to the number of amplicons per gene. Details of the genomic regions covered by the panel are in supplemental Table 1. (B) Total number of sequenced cells (top violin plot colored in violet), average allele dropout rate (ADO) per sample (middle violin plot colored in red), and average reads per amplicon per cell (bottom violin plot colored in green). Each point represents a sample (n=19) from 1 of the 12 MM patients. Median value is shown by a horizontal line. (C) Bar plot with the distribution of sequencing reads across the 127 amplicons. Each bar represents an amplicon, and the height of the bar shows the median number of raw sequenced reads per cell (n=19 samples). Amplicon name is shown for all the amplicons.

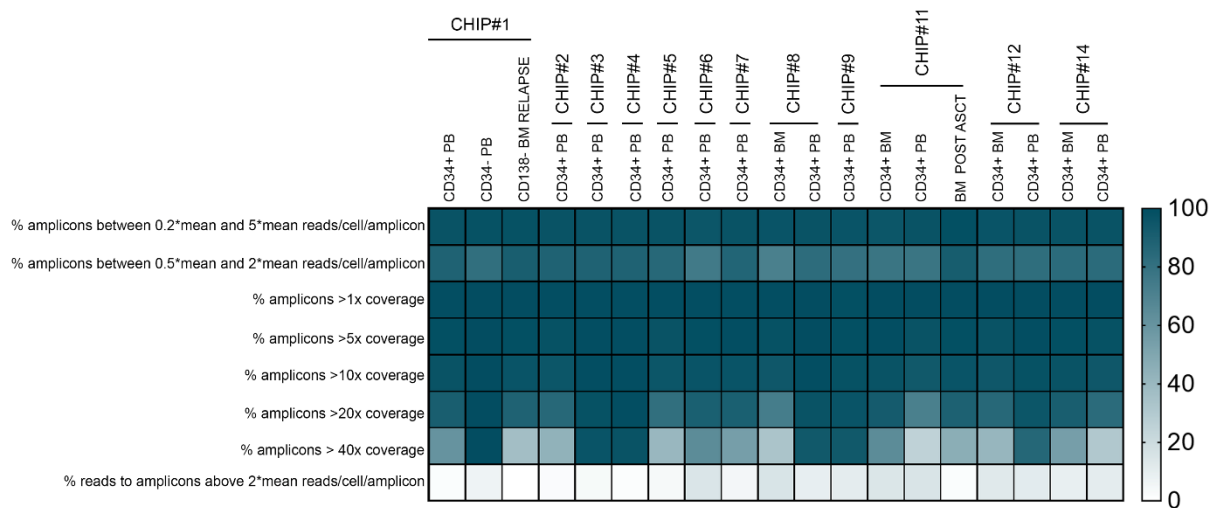

**Supplementary Figure 2**

**Supplementary Figure S2.** Panel performance for all patient's samples processed with the Tapestry platform for single-cell DNA sequencing. The AML panel used includes 127 amplicons and the heatmap shows the total coverage for all samples analysed (n=19). Each column represents a sample, and each row represents the relative percentage of reads/cell/amplicon for any given samples.

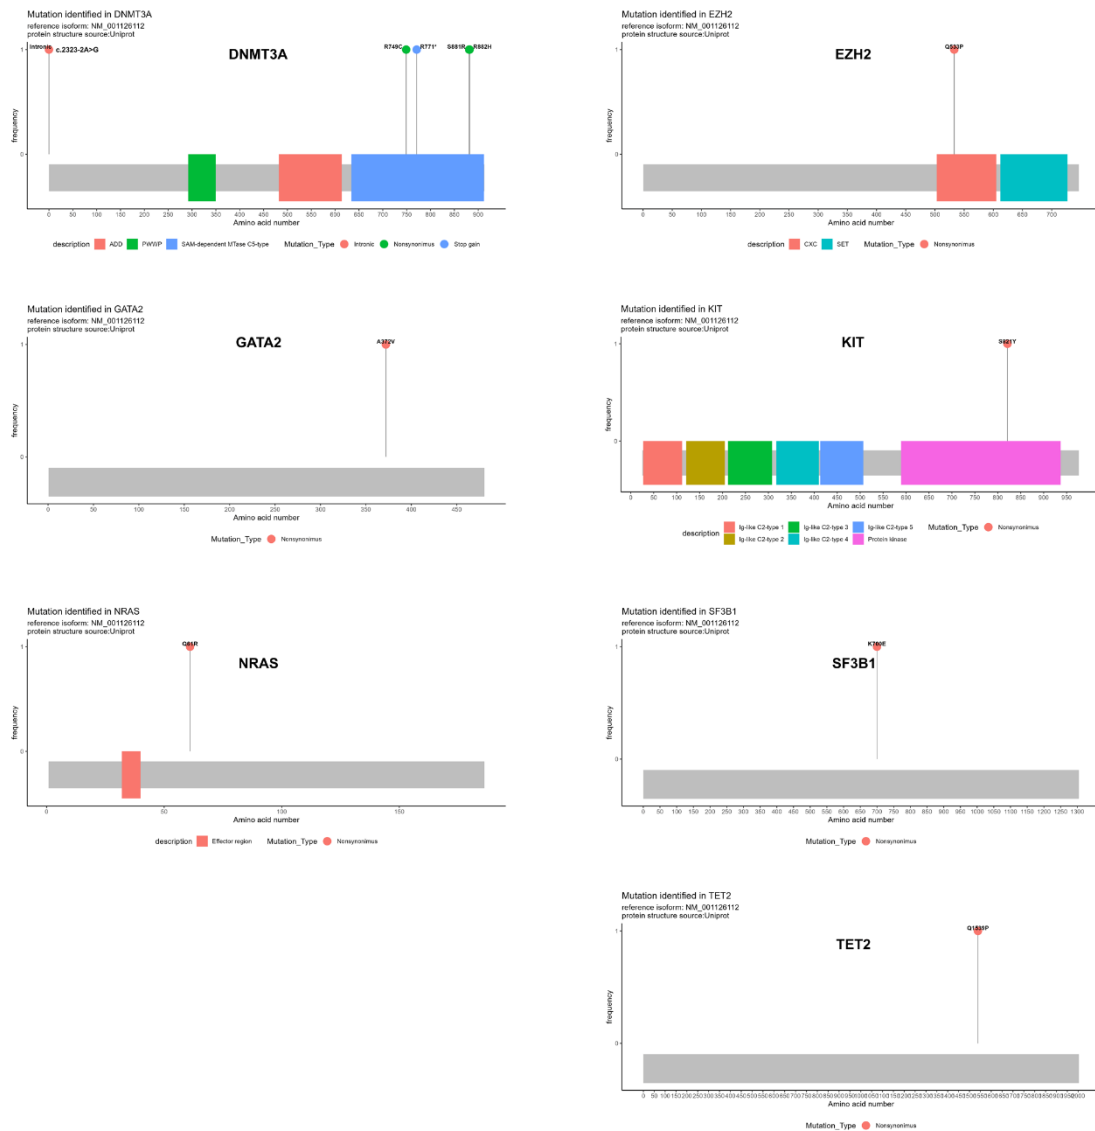

Supplementary Figure 3

**Supplementary Figure S3.** CHIP pathogenic mutations identified in MM patients in stem cells compartment at the time of transplant. Lolli plot showing the somatic mutation spectra throughout the protein sequence of DNMT3A, EZH2, GATA2, NRAS, KIT, SF3B1 and TET2. The scale bar represents the length (amino acids) of the protein sequence, and the corresponding domains are

indicated with coloured boxes. The corresponding variant name is shown on the top of the lolli plot specifying the coding impact.

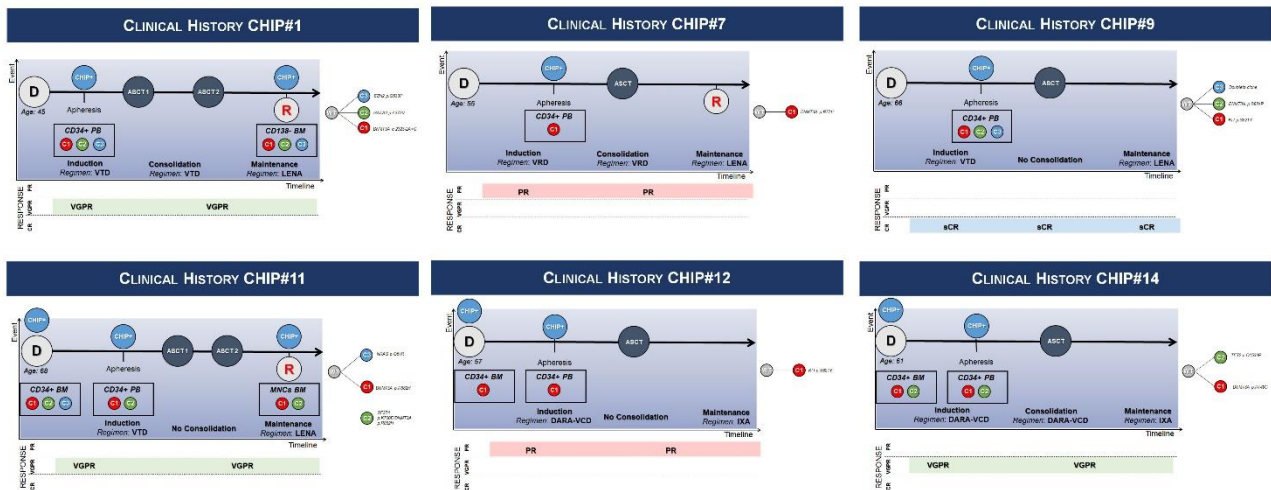

Supplementary Figure 4

#### Supplementary Figure S4. Clinical history and CHIP mutated clones for CHIP+ patients.

D=Diagnosis, R=Relapse, ASCT=Autologous stem cell transplantation, CD34+BM=bone marrow stem cells, CD34+ PB=stem cells from apheresis product, CD138- BM=bone marrow CD138- cells fraction, MNCs BM=bone marrow mononuclear cells, VTD=bortezomib-thalidomide-dexamethasone, VCD=bortezomib-cyclophosphamide-dexamethasone, VRD=bortezomib-lenalidomide-dexamethasone, DARA=daratumumab, LENA=lenalidomide, IXA=ixazomib.

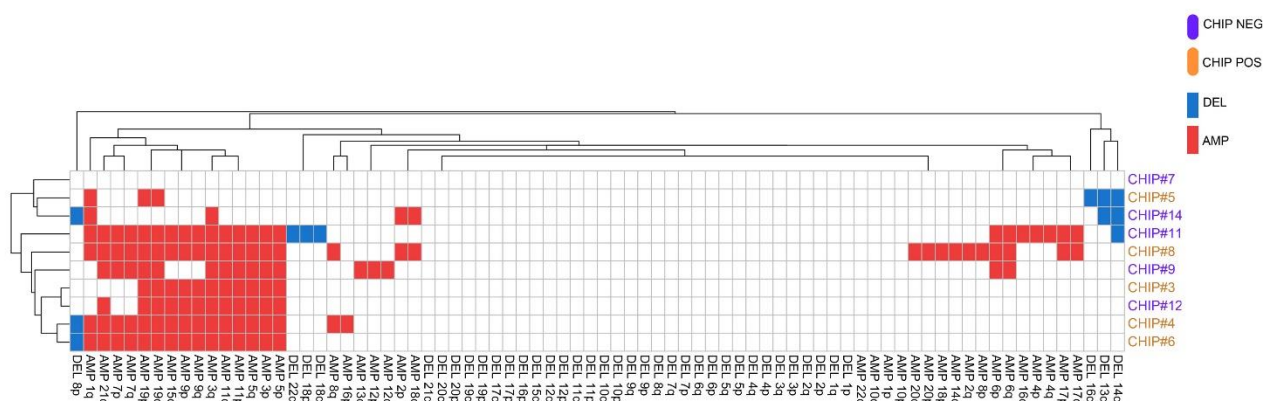

Supplementary Figure 5

**Supplementary Figure S5. Copy Number Alterations (CNAs) of myeloma patients.** On the CD138+ enriched fractions a genomic characterization by Ultra Low Pass-Whole Genome Sequencing (ULP-WGS) to evaluate whole genome's Copy Number Alterations (CNAs) profile were performed. ULP-WGS (0.1X coverage) was performed on genomic DNA samples from BM-PCs CD138+ cell fractions extracted by Maxwell® (Promega Italia Srl, Milan, Italy) using Maxwell® 16 LEV Blood DNA Kit. Library preparation was completed with SMARTer® ThruPLEX® DNA-Seq kit (Takara Bio, Mountain View, CA, USA). Sequencing was conducted on NextSeq 500 (Illumina Inc, San Diego, CA, USA), and IchorCNA was employed to assess CNAs profile. For CHIP#1 and CHIP#2, we were unable to assess the CNAs status due to insufficient material available for analysis.

**Supplementary Table S1. Panel Targets**

| Gene   | Exon   | Protein-level Variants                                                                                | cDNA Variants                                                              |
|--------|--------|-------------------------------------------------------------------------------------------------------|----------------------------------------------------------------------------|
| ASXL1  | 3      | G67                                                                                                   |                                                                            |
|        | 4      | K85                                                                                                   |                                                                            |
|        | 11     | R417; Q428; QA491; P511; A530                                                                         |                                                                            |
|        | 12     | W583; Q588; R606; A611; K618; A772; L775; Q778; R786; T787; E797; A809; W898; G927; W960; K982; V1060 |                                                                            |
| DNMT3A | 7      | D268                                                                                                  |                                                                            |
|        | 8      | P307; S312; W313; R320; W327                                                                          |                                                                            |
|        | 9      | L344; L347; R366                                                                                      |                                                                            |
|        | 10     | W409; L422                                                                                            |                                                                            |
|        | 11     | K429; Y436; E444; A447                                                                                |                                                                            |
|        | 13     | C494; C497; G511; M513                                                                                |                                                                            |
|        | 14     | Q527; C540; G543; L547; G550; C554; C555                                                              |                                                                            |
|        | 15     | E561; W581; L595; R598; Q606; D614                                                                    |                                                                            |
|        | 16     | R635; L637                                                                                            |                                                                            |
|        | 17     | L653; Y660; A662; S669; I681; D686; R688; V690                                                        |                                                                            |
|        | 18     | G699; D702; I705; G707; N711; L713; S714; V716; P718                                                  |                                                                            |
|        | 19     | F732; R736; R749; F751; F752; A760; S770; R771; L773; E774                                            |                                                                            |
|        | 20     | P777; R792; W795; G796; N797; M801; R803                                                              |                                                                            |
|        | 21     | E817; H821                                                                                            |                                                                            |
|        | 22     | K829; T835; N838; Q842; P849; M852; E863                                                              |                                                                            |
|        | 23     | F868; D876; N879; M880; S881; R882; Q886; W893; I898; R899; P904                                      |                                                                            |
|        | Intron |                                                                                                       | c.640-1437G>A;<br>c.1429+2T>C;<br>c.1667+1G>A;<br>c.2408+5G>A; c.2479-1G>T |
| EZH2   | 2      | M1; V13; Q28                                                                                          |                                                                            |
|        | 3      | N57                                                                                                   |                                                                            |
|        | 4      | M121                                                                                                  |                                                                            |
|        | 5      | H129; I131; Y133; Y153; G155                                                                          |                                                                            |
|        | 6      | R207                                                                                                  |                                                                            |
|        | 8      | E249; G266                                                                                            |                                                                            |
|        | 10     | T374                                                                                                  |                                                                            |
|        | 14     | C548                                                                                                  |                                                                            |
|        | 15     | K568; T573                                                                                            |                                                                            |
|        | 16     | G628; E645; Y646; C647; G648                                                                          |                                                                            |
|        | 17     | A656; D664; N675                                                                                      |                                                                            |
|        | 18     | R684; R690; N693; H694; S695                                                                          |                                                                            |
| FLT3   | 11     | E444; S451                                                                                            |                                                                            |
|        | 12     | V491; Q494; A506; I507; S519; S531                                                                    |                                                                            |
|        | 13     | I548                                                                                                  |                                                                            |
|        | 14     | Y572; L576; V592; F594                                                                                |                                                                            |
|        | 16     | M659; K663; M664; N676; A680                                                                          |                                                                            |
|        | 17     | Q730                                                                                                  |                                                                            |
|        | 19     | N781; T784                                                                                            |                                                                            |

|        |        |                                                                               |                                                                                          |
|--------|--------|-------------------------------------------------------------------------------|------------------------------------------------------------------------------------------|
|        | 20     | A814; V819; R834; D835; M837; S838; D839; N841; Y842                          |                                                                                          |
|        | 21     | A856; T866                                                                    |                                                                                          |
| GATA2  | 4      | P304; N317; A318; G320; L321; R330                                            |                                                                                          |
|        | 5      | T358; L359; R361; R362; A372                                                  |                                                                                          |
|        | 6      | R398                                                                          |                                                                                          |
| IDH1   | 4      | R132                                                                          |                                                                                          |
| IDH2   | 4      | R140; R172                                                                    |                                                                                          |
| JAK2   | 14     | V617                                                                          |                                                                                          |
| KIT    | 2      | P34; D52                                                                      |                                                                                          |
|        | 5      | D265                                                                          |                                                                                          |
|        | 9      | G487; G498                                                                    |                                                                                          |
|        | 11     | M552; W557; L576                                                              |                                                                                          |
|        | 12     | T594; A617; M618; P627                                                        |                                                                                          |
|        | 17     | D816; D829; N822; Y823                                                        |                                                                                          |
|        | 18     | A837                                                                          |                                                                                          |
| KRAS   | 2      | G12; G13; H27                                                                 |                                                                                          |
|        | 3      | T58; Q61                                                                      |                                                                                          |
|        | 4      | K117; A146                                                                    |                                                                                          |
| NPM1   | 11     | L287; W290                                                                    | c.860_861lin-sCTGC;<br>c.861_862lin-sTGCA;<br>c.863_864lin-sCATG;<br>c.867_868lin-sAGGA; |
| NRAS   | 2      | G12; G13                                                                      |                                                                                          |
|        | 3      | Q61                                                                           |                                                                                          |
| PTPN11 | 3      | N58; G60; D61; E69; F71; A72; T73; E76; Q79                                   |                                                                                          |
|        | 4      | E139                                                                          |                                                                                          |
|        | 7      | F285                                                                          |                                                                                          |
|        | 8      | M311                                                                          |                                                                                          |
|        | 11     | D437                                                                          |                                                                                          |
|        | 12     | A461; G464                                                                    |                                                                                          |
|        | 13     | P491; S502; G503; T507; Q510                                                  |                                                                                          |
| RUNX1  | 5      | G127; E138; S141; A142; R145; R157; D160; R162; G165; R166; S167; G168R; K171 |                                                                                          |
|        | 6      | V197; D198; S200; R201; R204                                                  |                                                                                          |
|        | 7      | R207; G217; S226; E229; R250; N260; M267                                      |                                                                                          |
|        | 8      | Y281; P298; E316                                                              |                                                                                          |
|        | Intron |                                                                               | c.805+1G>A                                                                               |
| SF3B1  | 14     | G605; S611; R625; H662; K666; A672                                            |                                                                                          |
|        | 15     | K700; V701; I704                                                              |                                                                                          |

|              |        |                                                                                                                                                                                                                                                               |                                                             |
|--------------|--------|---------------------------------------------------------------------------------------------------------------------------------------------------------------------------------------------------------------------------------------------------------------|-------------------------------------------------------------|
|              | 16     | G742; A749; R775; E776; D781                                                                                                                                                                                                                                  |                                                             |
|              | 17     | D799                                                                                                                                                                                                                                                          |                                                             |
|              | Intron |                                                                                                                                                                                                                                                               | c.2224-1G>A                                                 |
| <b>SRSF2</b> | 2      | R167                                                                                                                                                                                                                                                          |                                                             |
| <b>TET2</b>  | 3      | V9; E10; T27; L34; P46; Q80; G92; R96; D143; S145; S152; P174; E283; N312; Q325; Q414; Q147; Q481; R544; Q574; S588; Q591; Q622; Q635; H682; S714; Q734; Q810; S794; R814; S825; G898; Q913; Q916; P491; Q966; P989; W1003; Q1020; Q1053; Q1083; E1106; L1119 |                                                             |
|              | 4      | E1144; Y1148; N1156; R1167                                                                                                                                                                                                                                    |                                                             |
|              | 5      | Q1170; E1178; Q1191; C1193; W1198                                                                                                                                                                                                                             |                                                             |
|              | 6      | S1203; S1204; R1214; R1216; D1242; Y1245; Y1255; R1261; R1262                                                                                                                                                                                                 |                                                             |
|              | 7      | C1271; F1287; G1288; C1289; Y1294; C1298; E1318                                                                                                                                                                                                               |                                                             |
|              | 8      | L1322; E1323; L1340                                                                                                                                                                                                                                           |                                                             |
|              | 9      | R1359; H1366; C1378; H1380                                                                                                                                                                                                                                    |                                                             |
|              | 10     | C1396; E1401; R1404; R1440; R1452; R1465; S1486; L1511; A1512                                                                                                                                                                                                 |                                                             |
|              | 11     | R1516; Q1532; Q1539; Q1542; Q1548; Q1624; Q1652; V1718; L1721; P1723S; R1739; L1740; H1757; I1762; C1811; L1819; Q1828; G1861; S1898; V1900; H1904; H1912; A1919; R1926; P1941; P1962; R1966; P1988; Y1998; R2000; I2002                                      |                                                             |
|              | Intron |                                                                                                                                                                                                                                                               | c.3409+70G>A                                                |
| <b>TP53</b>  | 2      |                                                                                                                                                                                                                                                               | c.-87G>C; c.-93A>G                                          |
|              | 5      | L91; K93; F95; T101; V104; W107; V108; G115; R119; Y124; K125; Q126; H129; V134; R136; C137                                                                                                                                                                   |                                                             |
|              | 6      | H154; I156; R157; V164; Y166; R174; S176; Y181; P184                                                                                                                                                                                                          |                                                             |
|              | 7      | Y195; VM198; C199; N200; S202; C203; G206; R209; I215; E219                                                                                                                                                                                                   |                                                             |
|              | 8      | G223; L226; G227; R228; V233; R234; C236; A237; P239; D242; R244; R251                                                                                                                                                                                        |                                                             |
|              | 10     | F302; R303                                                                                                                                                                                                                                                    |                                                             |
|              | 11     | F346                                                                                                                                                                                                                                                          |                                                             |
|              | Intron |                                                                                                                                                                                                                                                               | c.259-2A>G; c.259-1G>A; c.443-1G>A; c.876+1G>A; c.877-1G>A; |
| <b>U2AF1</b> | 2      | R28; S34; R35                                                                                                                                                                                                                                                 |                                                             |
|              | 6      | R156; Q157                                                                                                                                                                                                                                                    |                                                             |
|              | 7      | R188                                                                                                                                                                                                                                                          |                                                             |



|     |        |                        |                                          |
|-----|--------|------------------------|------------------------------------------|
| WT1 | 4      | L299; M302; K321       |                                          |
|     | 6      | G356                   |                                          |
|     | 7      | R374; R375; S386       |                                          |
|     | 8      | R435; R436; R439; Q442 |                                          |
|     | 9      | R463; R467; D469; H470 |                                          |
|     | Intron |                        | c.1115_1264+1del;<br>c.1264+3_1264+4insT |

**Supplementary Table S2. Called somatic Variants.** All somatic coding variants identified in all samples analyzed (n=19). Overall 235 nucleotide variants have been called. SNV=Single Nucleotide Variant.

| Sample | Sample Type | Gene   | Chromosome | Variant                  | Function | Coding Impact | Variant Type | cDNA      | Protein Change | Genotyped Cells | Mutated Cells | VAF by cell count (%) | VAF by read count (%) |
|--------|-------------|--------|------------|--------------------------|----------|---------------|--------------|-----------|----------------|-----------------|---------------|-----------------------|-----------------------|
| CHIP14 | CD34+ BM    | ASXL1  | 20         | ASXL1:chr20:31015949:T/G | Coding   | Missense      | SNV          | c.271T>G  | p.S91A         | 4081 (54%)      | 101 (2%)      | 1.2                   | 8.7                   |
| CHIP12 | CD34+ PB    | ASXL1  | 20         | ASXL1:chr20:31015949:T/G | Coding   | Missense      | SNV          | c.271T>G  | p.S91A         | 3066 (56%)      | 55 (2%)       | 0.9                   | 9.1                   |
| CHIP9  | CD34+ PB    | ASXL1  | 20         | ASXL1:chr20:31021202:A/C | Coding   | Missense      | SNV          | c.1201A>C | p.T401P        | 2160 (78%)      | 37 (2%)       | 0.9                   | 5.1                   |
| CHIP9  | CD34+ PB    | ASXL1  | 20         | ASXL1:chr20:31021207:A/C | Coding   | Synonymous    | SNV          | c.1206A>C | p.R402=        | 2032 (74%)      | 42 (2%)       | 1.0                   | 5.2                   |
| CHIP8  | CD34+ PB    | ASXL1  | 20         | ASXL1:chr20:31021461:C/T | Coding   | Missense      | SNV          | c.1460C>T | p.A487V        | 1495 (52%)      | 703 (47%)     | 23.6                  | 17.0                  |
| CHIP9  | CD34+ PB    | ASXL1  | 20         | ASXL1:chr20:31021479:A/C | Coding   | Missense      | SNV          | c.1478A>C | p.E493A        | 1705 (62%)      | 31 (2%)       | 0.9                   | 5.4                   |
| CHIP4  | CD34+ PB    | ASXL1  | 20         | ASXL1:chr20:31021634:C/T | Coding   | Missense      | SNV          | c.1633C>T | p.R545C        | 778 (86%)       | 11 (1%)       | 0.7                   | 1.7                   |
| CHIP3  | CD34+ PB    | ASXL1  | 20         | ASXL1:chr20:31021634:C/T | Coding   | Missense      | SNV          | c.1633C>T | p.R545C        | 1216 (84%)      | 16 (1%)       | 0.7                   | 1.6                   |
| CHIP5  | CD34+ PB    | ASXL1  | 20         | ASXL1:chr20:31022396:G/A | Coding   | Synonymous    | SNV          | c.1881G>A | p.A627=        | 3013 (50%)      | 80 (3%)       | 1.3                   | 2.1                   |
| CHIP8  | CD34+ BM    | ASXL1  | 20         | ASXL1:chr20:31022396:G/A | Coding   | Synonymous    | SNV          | c.1881G>A | p.A627=        | 6999 (55%)      | 160 (2%)      | 1.1                   | 2.0                   |
| CHIP4  | CD34+ PB    | ASXL1  | 20         | ASXL1:chr20:31022938:C/A | Coding   | Missense      | SNV          | c.2423C>A | p.P808H        | 862 (95%)       | 818 (95%)     | 50.2                  | 51.2                  |
| CHIP9  | CD34+ PB    | ASXL1  | 20         | ASXL1:chr20:31023033:C/G | Coding   | Missense      | SNV          | c.2518C>G | p.P840A        | 1909 (69%)      | 39 (2%)       | 1.0                   | 4.2                   |
| CHIP14 | CD34+ BM    | ASXL1  | 20         | ASXL1:chr20:31023033:C/G | Coding   | Missense      | SNV          | c.2518C>G | p.P840A        | 4963 (66%)      | 117 (2%)      | 1.2                   | 1.8                   |
| CHIP12 | CD34+ PB    | ASXL1  | 20         | ASXL1:chr20:31023033:C/G | Coding   | Missense      | SNV          | c.2518C>G | p.P840A        | 3920 (72%)      | 115 (3%)      | 1.5                   | 2.2                   |
| CHIP11 | CD34+ PB    | ASXL1  | 20         | ASXL1:chr20:31023033:C/G | Coding   | Missense      | SNV          | c.2518C>G | p.P840A        | 5744 (61%)      | 160 (3%)      | 1.4                   | 1.9                   |
| CHIP11 | CD34+ BM    | ASXL1  | 20         | ASXL1:chr20:31023033:C/G | Coding   | Missense      | SNV          | c.2518C>G | p.P840A        | 798 (78%)       | 24 (3%)       | 1.5                   | 2.5                   |
| CHIP9  | CD34+ PB    | ASXL1  | 20         | ASXL1:chr20:31023045:A/C | Coding   | Missense      | SNV          | c.2530A>C | p.T844P        | 1434 (52%)      | 55 (4%)       | 1.9                   | 6.6                   |
| CHIP8  | CD34+ PB    | ASXL1  | 20         | ASXL1:chr20:31023122:T/G | Coding   | Synonymous    | SNV          | c.2607T>G | p.G869=        | 1505 (52%)      | 29 (2%)       | 1.0                   | 9.0                   |
| CHIP9  | CD34+ PB    | ASXL1  | 20         | ASXL1:chr20:31023126:T/G | Coding   | Missense      | SNV          | c.2611T>G | p.S871A        | 1653 (60%)      | 42 (3%)       | 1.3                   | 5.8                   |
| CHIP1  | CD34+ PB    | ASXL1  | 20         | ASXL1:chr20:31023286:C/T | Coding   | Missense      | SNV          | c.2771C>T | p.P924L        | 3160 (87%)      | 38 (1%)       | 0.6                   | 1.1                   |
| CHIP9  | CD34+ PB    | ASXL1  | 20         | ASXL1:chr20:31023362:T/G | Coding   | Synonymous    | SNV          | c.2847T>G | p.G949=        | 2031 (74%)      | 141 (7%)      | 3.5                   | 7.5                   |
| CHIP9  | CD34+ PB    | ASXL1  | 20         | ASXL1:chr20:31023714:T/G | Coding   | Missense      | SNV          | c.3199T>G | p.S1067A       | 1417 (51%)      | 35 (2%)       | 1.2                   | 7.3                   |
| CHIP9  | CD34+ PB    | DNMT3A | 2          | DNMT3A:chr2:25457213:A/C | Coding   | Missense      | SNV          | c.2674T>G | p.S892A        | 1607 (58%)      | 87 (5%)       | 2.7                   | 6.6                   |
| CHIP9  | CD34+ PB    | DNMT3A | 2          | DNMT3A:chr2:25457221:A/C | Coding   | Missense      | SNV          | c.2666T>G | p.L889R        | 1897 (69%)      | 45 (2%)       | 1.2                   | 5.9                   |

|        |              |        |   |                           |                                                  |            |          |             |             |            |            |      |      |
|--------|--------------|--------|---|---------------------------|--------------------------------------------------|------------|----------|-------------|-------------|------------|------------|------|------|
| CHIP11 | BM post ASCT | DNMT3A | 2 | DNMT3A:chr2:25457242:C/T  | Coding                                           | Missense   | SNV      | c.2645G>A   | p.R882H     | 5376 (88%) | 3985 (74%) | 39.6 | 38.5 |
| CHIP11 | CD34+ PB     | DNMT3A | 2 | DNMT3A:chr2:25457242:C/T  | Coding                                           | Missense   | SNV      | c.2645G>A   | p.R882H     | 6843 (72%) | 5312 (78%) | 41.3 | 37.1 |
| CHIP11 | CD34+ BM     | DNMT3A | 2 | DNMT3A:chr2:25457242:C/T  | Coding                                           | Missense   | SNV      | c.2645G>A   | p.R882H     | 837 (81%)  | 521 (62%)  | 35.2 | 34.5 |
| CHIP9  | CD34+ PB     | DNMT3A | 2 | DNMT3A:chr2:25457246:T/G  | Coding                                           | Missense   | SNV      | c.2641A>C   | p.S881R     | 1661 (60%) | 320 (19%)  | 9.6  | 13.4 |
| CHIP1  | CD34- PB     | DNMT3A | 2 | DNMT3A:chr2:25457246:T/G  | Coding                                           | Missense   | SNV      | c.2641A>C   | p.S881R     | 70 (71%)   | 20 (29%)   | 14.3 | 16.8 |
| CHIP8  | CD34+ PB     | DNMT3A | 2 | DNMT3A:chr2:25457246:T/G  | Coding                                           | Missense   | SNV      | c.2641A>C   | p.S881R     | 2555 (88%) | 50 (2%)    | 1.0  | 4.3  |
| CHIP1  | CD34- PB     | DNMT3A | 2 | DNMT3A:chr2:25457269:TG/T | NMD, coding <sup>(2)</sup>                       | Frameshift | Deletion | c.2617del   | p.H873Tfs*8 | 97 (99%)   | 2 (2%)     | 1.0  | 3.2  |
| CHIP12 | CD34+ PB     | DNMT3A | 2 | DNMT3A:chr2:25462007:A/C  | Coding, splicing                                 | Synonymous | SNV      | c.2400T>G   | p.G800=     | 3241 (60%) | 58 (2%)    | 0.9  | 6.6  |
| CHIP1  | CD34- PB     | DNMT3A | 2 | DNMT3A:chr2:25462086:T/G  | Intronic, splicing, splicing-ACMG <sup>(1)</sup> |            | SNV      | c.2323-2A>C |             | 61 (62%)   | 5 (8%)     | 4.1  | 4.6  |
| CHIP7  | CD34+ PB     | DNMT3A | 2 | DNMT3A:chr2:25463182:G/A  | NMD, coding <sup>(2)</sup>                       | Nonsense   | SNV      | c.2311C>T   | p.R771*     | 4758 (96%) | 134 (3%)   | 1.5  | 1.9  |
| CHIP14 | CD34+ PB     | DNMT3A | 2 | DNMT3A:chr2:25463248:G/A  | Coding                                           | Missense   | SNV      | c.2245C>T   | p.R749C     | 4973 (80%) | 121 (2%)   | 1.2  | 3.3  |
| CHIP14 | CD34+ BM     | DNMT3A | 2 | DNMT3A:chr2:25463248:G/A  | Coding                                           | Missense   | SNV      | c.2245C>T   | p.R749C     | 6361 (85%) | 100 (2%)   | 0.8  | 3.0  |
| CHIP1  | CD34- PB     | DNMT3A | 2 | DNMT3A:chr2:25463595:T/G  | Coding, splicing                                 | Missense   | SNV      | c.2087A>C   | p.Q696P     | 66 (67%)   | 9 (14%)    | 6.8  | 8.4  |
| CHIP1  | CD34- PB     | DNMT3A | 2 | DNMT3A:chr2:25464452:G/A  | Coding                                           | Synonymous | SNV      | c.2061C>T   | p.V687=     | 93 (95%)   | 1 (1%)     | 0.5  | 3.5  |
| CHIP8  | CD34+ PB     | DNMT3A | 2 | DNMT3A:chr2:25467131:T/G  | Coding                                           | Missense   | SNV      | c.1744A>C   | p.N582H     | 1537 (53%) | 41 (3%)    | 1.3  | 4.9  |
| CHIP1  | CD138- BM    | DNMT3A | 2 | DNMT3A:chr2:25467453:A/C  | Coding                                           | Missense   | SNV      | c.1623T>G   | p.C541W     | 4601 (54%) | 131 (3%)   | 1.4  | 5.3  |
| CHIP9  | CD34+ PB     | DNMT3A | 2 | DNMT3A:chr2:25467455:A/C  | Coding                                           | Missense   | SNV      | c.1621T>G   | p.C541G     | 1660 (60%) | 28 (2%)    | 0.8  | 3.5  |
| CHIP8  | CD34+ PB     | DNMT3A | 2 | DNMT3A:chr2:25467487:T/G  | Coding                                           | Missense   | SNV      | c.1589A>C   | p.D530A     | 1452 (50%) | 30 (2%)    | 1.0  | 7.5  |
| CHIP4  | CD34+ PB     | DNMT3A | 2 | DNMT3A:chr2:25469502:C/T  | Coding                                           | Synonymous | SNV      | c.1266G>A   | p.L422=     | 776 (86%)  | 694 (89%)  | 52.4 | 52.8 |
| CHIP3  | CD34+ PB     | DNMT3A | 2 | DNMT3A:chr2:25469502:C/T  | Coding                                           | Synonymous | SNV      | c.1266G>A   | p.L422=     | 1269 (88%) | 1157 (91%) | 50.9 | 51.3 |
| CHIP1  | CD34+ PB     | DNMT3A | 2 | DNMT3A:chr2:25469502:C/T  | Coding                                           | Synonymous | SNV      | c.1266G>A   | p.L422=     | 2103 (58%) | 1985 (94%) | 54.4 | 53.7 |
| CHIP1  | CD34- PB     | DNMT3A | 2 | DNMT3A:chr2:25469502:C/T  | Coding                                           | Synonymous | SNV      | c.1266G>A   | p.L422=     | 81 (83%)   | 69 (85%)   | 46.9 | 43.7 |
| CHIP8  | CD34+ PB     | DNMT3A | 2 | DNMT3A:chr2:25469502:C/T  | Coding                                           | Synonymous | SNV      | c.1266G>A   | p.L422=     | 1703 (59%) | 1514 (89%) | 52.2 | 51.2 |
| CHIP5  | CD34+ PB     | EZH2   | 7 | EZH2:chr7:148508780:G/C   | Coding                                           | Synonymous | SNV      | c.1884C>G   | p.G628=     | 5776 (97%) | 5705 (99%) | 50.2 | 51.1 |
| CHIP1  | CD138- BM    | EZH2   | 7 | EZH2:chr7:148511139:T/G   | Coding                                           | Missense   | SNV      | c.1763A>C   | p.D588A     | 4782 (56%) | 131 (3%)   | 1.4  | 6.5  |
| CHIP9  | CD34+ PB     | EZH2   | 7 | EZH2:chr7:148511145:T/G   | Coding                                           | Missense   | SNV      | c.1757A>C   | p.D586A     | 1960 (71%) | 36 (2%)    | 0.9  | 7.3  |
| CHIP6  | CD34+ PB     | EZH2   | 7 | EZH2:chr7:148511171:C/T   | Coding                                           | Synonymous | SNV      | c.1731G>A   | p.P577=     | 2558 (87%) | 2463 (96%) | 50.1 | 52.1 |

|               |              |      |    |                            |                            |            |          |                |              |            |            |      |      |
|---------------|--------------|------|----|----------------------------|----------------------------|------------|----------|----------------|--------------|------------|------------|------|------|
| <b>CHIP11</b> | BM post ASCT | EZH2 | 7  | EZH2:chr7:148512080:T/G    | Coding                     | Missense   | SNV      | c.1598A>C      | p.Q533P      | 3386 (55%) | 124 (4%)   | 1.8  | 5.1  |
| <b>CHIP1</b>  | CD138-BM     | EZH2 | 7  | EZH2:chr7:148512080:T/G    | Coding                     | Missense   | SNV      | c.1598A>C      | p.Q533P      | 5084 (60%) | 182 (4%)   | 1.8  | 4.8  |
| <b>CHIP14</b> | CD34+ BM     | EZH2 | 7  | EZH2:chr7:148512080:T/G    | Coding                     | Missense   | SNV      | c.1598A>C      | p.Q533P      | 4309 (57%) | 134 (3%)   | 1.6  | 4.8  |
| <b>CHIP8</b>  | CD34+ BM     | EZH2 | 7  | EZH2:chr7:148512080:T/G    | Coding                     | Missense   | SNV      | c.1598A>C      | p.Q533P      | 6765 (53%) | 130 (2%)   | 1.0  | 3.2  |
| <b>CHIP12</b> | CD34+ BM     | EZH2 | 7  | EZH2:chr7:148512080:T/G    | Coding                     | Missense   | SNV      | c.1598A>C      | p.Q533P      | 2175 (54%) | 49 (2%)    | 1.1  | 3.5  |
| <b>CHIP1</b>  | CD34- PB     | EZH2 | 7  | EZH2:chr7:148514997:CTCT/C | Coding                     | In frame   | Deletion | c.1209_1211del | p.E404del    | 72 (73%)   | 1 (1%)     | 0.7  | 4.8  |
| <b>CHIP1</b>  | CD34- PB     | EZH2 | 7  | EZH2:chr7:148515091:G/A    | Coding                     | Missense   | SNV      | c.1118C>T      | p.P373L      | 98 (100%)  | 1 (1%)     | 0.5  | 4.5  |
| <b>CHIP1</b>  | CD34- PB     | EZH2 | 7  | EZH2:chr7:148525854:T/C    | Coding                     | Synonymous | SNV      | c.603A>G       | p.K201=      | 98 (100%)  | 2 (2%)     | 1.0  | 1.8  |
| <b>CHIP1</b>  | CD34- PB     | EZH2 | 7  | EZH2:chr7:148526901:C/T    | Coding                     | Missense   | SNV      | c.403G>A       | p.G135R      | 98 (100%)  | 1 (1%)     | 0.5  | 5.6  |
| <b>CHIP6</b>  | CD34+ PB     | EZH2 | 7  | EZH2:chr7:148526923:A/G    | Coding                     | Synonymous | SNV      | c.381T>C       | p.V127=      | 1799 (61%) | 1746 (97%) | 48.5 | 32.3 |
| <b>CHIP7</b>  | CD34+ PB     | EZH2 | 7  | EZH2:chr7:148526923:A/G    | Coding                     | Synonymous | SNV      | c.381T>C       | p.V127=      | 2887 (58%) | 2726 (94%) | 47.2 | 29.8 |
| <b>CHIP4</b>  | CD34+ PB     | EZH2 | 7  | EZH2:chr7:148526923:A/G    | Coding                     | Synonymous | SNV      | c.381T>C       | p.V127=      | 588 (65%)  | 558 (95%)  | 47.4 | 28.9 |
| <b>CHIP3</b>  | CD34+ PB     | EZH2 | 7  | EZH2:chr7:148526923:A/G    | Coding                     | Synonymous | SNV      | c.381T>C       | p.V127=      | 1101 (76%) | 1075 (98%) | 48.8 | 30.2 |
| <b>CHIP11</b> | BM post ASCT | EZH2 | 7  | EZH2:chr7:148526923:A/G    | Coding                     | Synonymous | SNV      | c.381T>C       | p.V127=      | 3477 (57%) | 3236 (93%) | 46.5 | 28.7 |
| <b>CHIP1</b>  | CD34+ PB     | EZH2 | 7  | EZH2:chr7:148526923:A/G    | Coding                     | Synonymous | SNV      | c.381T>C       | p.V127=      | 2291 (63%) | 2189 (96%) | 47.8 | 29.2 |
| <b>CHIP14</b> | CD34+ BM     | EZH2 | 7  | EZH2:chr7:148526923:A/G    | Coding                     | Synonymous | SNV      | c.381T>C       | p.V127=      | 4515 (60%) | 4150 (92%) | 46.0 | 29.4 |
| <b>CHIP8</b>  | CD34+ PB     | EZH2 | 7  | EZH2:chr7:148526923:A/G    | Coding                     | Synonymous | SNV      | c.381T>C       | p.V127=      | 2079 (72%) | 1960 (94%) | 47.1 | 31.4 |
| <b>CHIP12</b> | CD34+ PB     | EZH2 | 7  | EZH2:chr7:148526923:A/G    | Coding                     | Synonymous | SNV      | c.381T>C       | p.V127=      | 3817 (70%) | 3704 (97%) | 48.5 | 33.1 |
| <b>CHIP12</b> | CD34+ BM     | EZH2 | 7  | EZH2:chr7:148526923:A/G    | Coding                     | Synonymous | SNV      | c.381T>C       | p.V127=      | 2148 (53%) | 1994 (93%) | 46.4 | 30.5 |
| <b>CHIP11</b> | CD34+ PB     | EZH2 | 7  | EZH2:chr7:148526923:A/G    | Coding                     | Synonymous | SNV      | c.381T>C       | p.V127=      | 5113 (54%) | 4903 (96%) | 47.9 | 31.8 |
| <b>CHIP11</b> | CD34+ BM     | EZH2 | 7  | EZH2:chr7:148526923:A/G    | Coding                     | Synonymous | SNV      | c.381T>C       | p.V127=      | 691 (67%)  | 664 (96%)  | 48.0 | 33.8 |
| <b>CHIP9</b>  | CD34+ PB     | EZH2 | 7  | EZH2:chr7:148529751:C/A    | Coding                     | Missense   | SNV      | c.338G>T       | p.W113L      | 1650 (60%) | 35 (2%)    | 1.1  | 3.6  |
| <b>CHIP9</b>  | CD34+ PB     | EZH2 | 7  | EZH2:chr7:148529754:G/T    | Coding                     | Missense   | SNV      | c.335C>A       | p.S112Y      | 1586 (57%) | 29 (2%)    | 0.9  | 4.1  |
| <b>CHIP1</b>  | CD34- PB     | FLT3 | 13 | FLT3:chr13:28601250:TG/T   | NMD, coding <sup>(2)</sup> | Frameshift | Deletion | c.2181del      | p.T728Lfs*53 | 93 (95%)   | 2 (2%)     | 1.1  | 7.5  |
| <b>CHIP1</b>  | CD34- PB     | FLT3 | 13 | FLT3:chr13:28608288:A/G    | Coding                     | Missense   | SNV      | c.1768T>C      | p.F590L      | 98 (100%)  | 1 (1%)     | 0.5  | 5.6  |
| <b>CHIP1</b>  | CD34- PB     | FLT3 | 13 | FLT3:chr13:28609667:C/T    | Coding                     | Missense   | SNV      | c.1562G>A      | p.G521D      | 98 (100%)  | 1 (1%)     | 0.5  | 6.1  |

|               |              |       |    |                           |                                                |            |                        |              |             |             |           |      |      |
|---------------|--------------|-------|----|---------------------------|------------------------------------------------|------------|------------------------|--------------|-------------|-------------|-----------|------|------|
| <b>CHIP6</b>  | CD34+ PB     | GATA2 | 3  | GATA2:chr3:128200690:G/A  | Coding                                         | Missense   | SNV                    | c.1115C>T    | p.A372V     | 2423 (82%)  | 30 (1%)   | 0.6  | 1.3  |
| <b>CHIP7</b>  | CD34+ PB     | GATA2 | 3  | GATA2:chr3:128200690:G/A  | Coding                                         | Missense   | SNV                    | c.1115C>T    | p.A372V     | 3454 (70%)  | 67 (2%)   | 1.0  | 1.5  |
| <b>CHIP4</b>  | CD34+ PB     | GATA2 | 3  | GATA2:chr3:128200690:G/A  | Coding                                         | Missense   | SNV                    | c.1115C>T    | p.A372V     | 768 (85%)   | 10 (1%)   | 0.7  | 1.7  |
| <b>CHIP11</b> | BM post ASCT | GATA2 | 3  | GATA2:chr3:128200690:G/A  | Coding                                         | Missense   | SNV                    | c.1115C>T    | p.A372V     | 4017 (66%)  | 105 (3%)  | 1.3  | 2.4  |
| <b>CHIP1</b>  | CD34+ PB     | GATA2 | 3  | GATA2:chr3:128200690:G/A  | Coding                                         | Missense   | SNV                    | c.1115C>T    | p.A372V     | 2549 (70%)  | 51 (2%)   | 2.4  | 1.6  |
| <b>CHIP1</b>  | CD138-BM     | GATA2 | 3  | GATA2:chr3:128200690:G/A  | Coding                                         | Missense   | SNV                    | c.1115C>T    | p.A372V     | 5010 (59%)  | 127 (3%)  | 1.3  | 2.6  |
| <b>CHIP11</b> | CD34+ BM     | GATA2 | 3  | GATA2:chr3:128200690:G/A  | Coding                                         | Missense   | SNV                    | c.1115C>T    | p.A372V     | 674 (66%)   | 13 (2%)   | 1.0  | 1.6  |
| <b>CHIP9</b>  | CD34+ PB     | GATA2 | 3  | GATA2:chr3:128200787:A/T  | Coding, splicing, splicing-ACMG <sup>(4)</sup> | Missense   | SNV                    | c.1018T>A    | p.S340T     | 1967 (71%)  | 181 (9%)  | 4.6  | 4.7  |
| <b>CHIP1</b>  | CD34- PB     | IDH1  | 2  | IDH1:chr2:209113159:AT/A  | NMD, coding <sup>(2)</sup>                     | Frameshift | Deletion (homopolymer) | c.347del     | p.N116Ifs*6 | 98 (100%)   | 1 (1%)    | 0.5  | 5.9  |
| <b>CHIP4</b>  | CD34+ PB     | IDH1  | 2  | IDH1:chr2:209113192:G/A   | Coding                                         | Synonymous | SNV                    | c.315C>T     | p.G105=     | 864 (96%)   | 831 (96%) | 49.7 | 50.4 |
| <b>CHIP9</b>  | CD34+ PB     | IDH2  | 15 | IDH2:chr15:90631828:A/C   | Coding, splicing                               | Missense   | SNV                    | c.525T>G     | p.H175Q     | 1485 (54%)  | 49 (3%)   | 1.6  | 4.3  |
| <b>CHIP1</b>  | CD34- PB     | JAK2  | 9  | JAK2:chr9:5073752:T/A     | Coding                                         | Missense   | SNV                    | c.1831T>A    | p.L611I     | 96 (98%)    | 1 (1%)    | 0.5  | 6.1  |
| <b>CHIP1</b>  | CD34- PB     | KIT   | 4  | KIT:chr4:55561718:ACCAT/A | NMD, coding <sup>(2)</sup>                     | Frameshift | Deletion               | c.120_123del | p.H40Qfs*6  | 93 (95%)    | 1 (1%)    | 0.5  | 3.4  |
| <b>CHIP6</b>  | CD34+ PB     | KIT   | 4  | KIT:chr4:55569900:A/T     | Coding                                         | Missense   | SNV                    | c.767A>T     | p.Q256L     | 2300 (78%)  | 50 (2%)   | 1.1  | 1.9  |
| <b>CHIP5</b>  | CD34+ PB     | KIT   | 4  | KIT:chr4:55569900:A/T     | Coding                                         | Missense   | SNV                    | c.767A>T     | p.Q256L     | 3316 (56%)  | 117 (4%)  | 1.8  | 2.1  |
| <b>CHIP2</b>  | CD34+ PB     | KIT   | 4  | KIT:chr4:55569900:A/T     | Coding                                         | Missense   | SNV                    | c.767A>T     | p.Q256L     | 6544 (54%)  | 255 (4%)  | 1.9  | 2.1  |
| <b>CHIP14</b> | CD34+ BM     | KIT   | 4  | KIT:chr4:55569900:A/T     | Coding                                         | Missense   | SNV                    | c.767A>T     | p.Q256L     | 4988 (66%)  | 131 (3%)  | 1.3  | 1.8  |
| <b>CHIP8</b>  | CD34+ PB     | KIT   | 4  | KIT:chr4:55569900:A/T     | Coding                                         | Missense   | SNV                    | c.767A>T     | p.Q256L     | 2472 (86%)  | 44 (2%)   | 0.9  | 1.9  |
| <b>CHIP12</b> | CD34+ PB     | KIT   | 4  | KIT:chr4:55569900:A/T     | Coding                                         | Missense   | SNV                    | c.767A>T     | p.Q256L     | 3880 (71%)  | 151 (4%)  | 1.9  | 2.1  |
| <b>CHIP12</b> | CD34+ BM     | KIT   | 4  | KIT:chr4:55569900:A/T     | Coding                                         | Missense   | SNV                    | c.767A>T     | p.Q256L     | 2370 (59%)  | 42 (2%)   | 0.9  | 1.3  |
| <b>CHIP11</b> | CD34+ PB     | KIT   | 4  | KIT:chr4:55569900:A/T     | Coding                                         | Missense   | SNV                    | c.767A>T     | p.Q256L     | 5025 (53%)  | 151 (3%)  | 1.5  | 1.5  |
| <b>CHIP11</b> | CD34+ BM     | KIT   | 4  | KIT:chr4:55569900:A/T     | Coding                                         | Missense   | SNV                    | c.767A>T     | p.Q256L     | 709 (69%)   | 20 (3%)   | 1.4  | 2.1  |
| <b>CHIP9</b>  | CD34+ PB     | KIT   | 4  | KIT:chr4:55599336:C/A     | Coding                                         | Missense   | SNV                    | c.2462C>A    | p.S821Y     | 1463 (53%)  | 926 (63%) | 31.6 | 23.8 |
| <b>CHIP3</b>  | CD34+ PB     | KIT   | 4  | KIT:chr4:55599336:C/A     | Coding                                         | Missense   | SNV                    | c.2462C>A    | p.S821Y     | 981 (68%)   | 27 (3%)   | 1.4  | 7.4  |
| <b>CHIP2</b>  | CD34+ PB     | KIT   | 4  | KIT:chr4:55599336:C/A     | Coding                                         | Missense   | SNV                    | c.2462C>A    | p.S821Y     | 10534 (87%) | 183 (2%)  | 0.9  | 3.4  |
| <b>CHIP11</b> | BM post ASCT | KIT   | 4  | KIT:chr4:55599336:C/A     | Coding                                         | Missense   | SNV                    | c.2462C>A    | p.S821Y     | 4887 (80%)  | 133 (3%)  | 1.4  | 4.8  |
| <b>CHIP1</b>  | CD138-BM     | KIT   | 4  | KIT:chr4:55599336:C/A     | Coding                                         | Missense   | SNV                    | c.2462C>A    | p.S821Y     | 6809 (80%)  | 142 (2%)  | 1.0  | 3.8  |

|               |              |        |    |                            |        |            |     |           |         |             |             |      |      |
|---------------|--------------|--------|----|----------------------------|--------|------------|-----|-----------|---------|-------------|-------------|------|------|
| <b>CHIP1</b>  | CD34- PB     | KIT    | 4  | KIT:chr4:55599336:C/A      | Coding | Missense   | SNV | c.2462C>A | p.S821Y | 54 (55%)    | 50 (93%)    | 46.3 | 26.7 |
| <b>CHIP14</b> | CD34+ PB     | KIT    | 4  | KIT:chr4:55599336:C/A      | Coding | Missense   | SNV | c.2462C>A | p.S821Y | 3937 (63%)  | 203 (5%)    | 2.6  | 6.1  |
| <b>CHIP14</b> | CD34+ BM     | KIT    | 4  | KIT:chr4:55599336:C/A      | Coding | Missense   | SNV | c.2462C>A | p.S821Y | 5479 (73%)  | 462 (8%)    | 4.2  | 8.8  |
| <b>CHIP8</b>  | CD34+ BM     | KIT    | 4  | KIT:chr4:55599336:C/A      | Coding | Missense   | SNV | c.2462C>A | p.S821Y | 8445 (66%)  | 226 (3%)    | 1.3  | 3.9  |
| <b>CHIP12</b> | CD34+ PB     | KIT    | 4  | KIT:chr4:55599336:C/A      | Coding | Missense   | SNV | c.2462C>A | p.S821Y | 3424 (63%)  | 533 (16%)   | 7.8  | 14.4 |
| <b>CHIP12</b> | CD34+ BM     | KIT    | 4  | KIT:chr4:55599336:C/A      | Coding | Missense   | SNV | c.2462C>A | p.S821Y | 2500 (62%)  | 185 (7%)    | 3.7  | 7.4  |
| <b>CHIP11</b> | CD34+ PB     | KIT    | 4  | KIT:chr4:55599336:C/A      | Coding | Missense   | SNV | c.2462C>A | p.S821Y | 7001 (74%)  | 125 (2%)    | 0.9  | 2.9  |
| <b>CHIP11</b> | CD34+ BM     | KIT    | 4  | KIT:chr4:55599336:C/A      | Coding | Missense   | SNV | c.2462C>A | p.S821Y | 674 (66%)   | 60 (9%)     | 4.5  | 9.2  |
| <b>CHIP6</b>  | CD34+ PB     | KIT    | 4  | KIT:chr4:55602765:G/C      | Coding | Synonymous | SNV | c.2586G>C | p.L862= | 2591 (88%)  | 2505 (97%)  | 49.9 | 51.3 |
| <b>CHIP2</b>  | CD34+ PB     | KIT    | 4  | KIT:chr4:55602765:G/C      | Coding | Synonymous | SNV | c.2586G>C | p.L862= | 11162 (92%) | 11061 (99%) | 50.1 | 50.5 |
| <b>CHIP8</b>  | CD34+ PB     | KIT    | 4  | KIT:chr4:55602765:G/C      | Coding | Synonymous | SNV | c.2586G>C | p.L862= | 2550 (88%)  | 2436 (96%)  | 49.8 | 51.3 |
| <b>CHIP8</b>  | CD34+ BM     | KIT    | 4  | KIT:chr4:55602765:G/C      | Coding | Synonymous | SNV | c.2586G>C | p.L862= | 8154 (64%)  | 8092 (99%)  | 49.9 | 50.2 |
| <b>CHIP8</b>  | CD34+ PB     | KRAS   | 12 | KRAS:chr12:25380328:C/A    | Coding | Missense   | SNV | c.130G>T  | p.V44L  | 1678 (58%)  | 110 (7%)    | 3.3  | 8.5  |
| <b>CHIP12</b> | CD34+ PB     | KRAS   | 12 | KRAS:chr12:25380328:C/A    | Coding | Missense   | SNV | c.130G>T  | p.V44L  | 4131 (76%)  | 122 (3%)    | 1.5  | 6.2  |
| <b>CHIP6</b>  | CD34+ PB     | NRAS   | 1  | NRAS:chr1:115256513:G/A    | Coding | Synonymous | SNV | c.198C>T  | p.A66=  | 2594 (88%)  | 40 (2%)     | 0.8  | 2.2  |
| <b>CHIP7</b>  | CD34+ PB     | NRAS   | 1  | NRAS:chr1:115256513:G/A    | Coding | Synonymous | SNV | c.198C>T  | p.A66=  | 4241 (86%)  | 72 (2%)     | 0.8  | 1.9  |
| <b>CHIP4</b>  | CD34+ PB     | NRAS   | 1  | NRAS:chr1:115256513:G/A    | Coding | Synonymous | SNV | c.198C>T  | p.A66=  | 765 (85%)   | 11 (1%)     | 0.7  | 3.1  |
| <b>CHIP3</b>  | CD34+ PB     | NRAS   | 1  | NRAS:chr1:115256513:G/A    | Coding | Synonymous | SNV | c.198C>T  | p.A66=  | 1150 (79%)  | 23 (2%)     | 1.0  | 3.3  |
| <b>CHIP11</b> | BM post ASCT | NRAS   | 1  | NRAS:chr1:115256513:G/A    | Coding | Synonymous | SNV | c.198C>T  | p.A66=  | 4666 (76%)  | 67 (1%)     | 0.7  | 2.8  |
| <b>CHIP1</b>  | CD34+ PB     | NRAS   | 1  | NRAS:chr1:115256513:G/A    | Coding | Synonymous | SNV | c.198C>T  | p.A66=  | 2981 (82%)  | 72 (2%)     | 1.2  | 2.3  |
| <b>CHIP11</b> | CD34+ BM     | NRAS   | 1  | NRAS:chr1:115256513:G/A    | Coding | Synonymous | SNV | c.198C>T  | p.A66=  | 860 (84%)   | 11 (1%)     | 0.6  | 2.4  |
| <b>CHIP11</b> | CD34+ BM     | NRAS   | 1  | NRAS:chr1:115256529:T/C    | Coding | Missense   | SNV | c.182A>G  | p.Q61R  | 945 (92%)   | 19 (2%)     | 1.1  | 2.3  |
| <b>CHIP11</b> | BM post ASCT | PTPN11 | 12 | PTPN11:chr12:112891084:A/C | Coding | Missense   | SNV | c.418A>C  | p.S140R | 5006 (82%)  | 166 (3%)    | 1.7  | 6.2  |
| <b>CHIP1</b>  | CD138- BM    | PTPN11 | 12 | PTPN11:chr12:112891084:A/C | Coding | Missense   | SNV | c.418A>C  | p.S140R | 7432 (87%)  | 91 (1%)     | 0.6  | 5.0  |
| <b>CHIP14</b> | CD34+ PB     | PTPN11 | 12 | PTPN11:chr12:112891084:A/C | Coding | Missense   | SNV | c.418A>C  | p.S140R | 5026 (81%)  | 250 (5%)    | 2.5  | 6.2  |
| <b>CHIP14</b> | CD34+ BM     | PTPN11 | 12 | PTPN11:chr12:112891084:A/C | Coding | Missense   | SNV | c.418A>C  | p.S140R | 5856 (78%)  | 186 (3%)    | 1.6  | 6.2  |

|               |           |        |    |                            |                                                |            |     |           |          |             |            |      |      |
|---------------|-----------|--------|----|----------------------------|------------------------------------------------|------------|-----|-----------|----------|-------------|------------|------|------|
| <b>CHIP8</b>  | CD34+ BM  | PTPN11 | 12 | PTPN11:chr12:112891084:A/C | Coding                                         | Missense   | SNV | c.418A>C  | p.S140R  | 10982 (86%) | 187 (2%)   | 0.9  | 4.3  |
| <b>CHIP12</b> | CD34+ PB  | PTPN11 | 12 | PTPN11:chr12:112891084:A/C | Coding                                         | Missense   | SNV | c.418A>C  | p.S140R  | 3593 (66%)  | 253 (7%)   | 3.5  | 7.7  |
| <b>CHIP12</b> | CD34+ BM  | PTPN11 | 12 | PTPN11:chr12:112891084:A/C | Coding                                         | Missense   | SNV | c.418A>C  | p.S140R  | 3451 (86%)  | 43 (1%)    | 0.6  | 5.1  |
| <b>CHIP11</b> | CD34+ BM  | PTPN11 | 12 | PTPN11:chr12:112891084:A/C | Coding                                         | Missense   | SNV | c.418A>C  | p.S140R  | 775 (75%)   | 24 (3%)    | 1.5  | 6.4  |
| <b>CHIP9</b>  | CD34+ PB  | PTPN11 | 12 | PTPN11:chr12:112891098:T/G | Coding                                         | Synonymous | SNV | c.432T>G  | p.P144=  | 2054 (74%)  | 125 (6%)   | 3.0  | 6.5  |
| <b>CHIP1</b>  | CD34- PB  | PTPN11 | 12 | PTPN11:chr12:112926935:C/T | NMD, coding <sup>(2)</sup>                     | Nonsense   | SNV | c.1555C>T | p.Q519*  | 94 (96%)    | 2 (2%)     | 1.1  | 3.5  |
| <b>CHIP1</b>  | CD34- PB  | RUNX1  | 21 | RUNX1:chr21:36171713:G/A   | Coding                                         | Synonymous | SNV | c.852C>T  | p.S284=  | 90 (92%)    | 1 (1%)     | 0.6  | 2.4  |
| <b>CHIP4</b>  | CD34+ PB  | RUNX1  | 21 | RUNX1:chr21:36206776:T/G   | Coding                                         | Missense   | SNV | c.736A>C  | p.T246P  | 558 (62%)   | 10 (2%)    | 0.9  | 8.5  |
| <b>CHIP3</b>  | CD34+ PB  | RUNX1  | 21 | RUNX1:chr21:36206776:T/G   | Coding                                         | Missense   | SNV | c.736A>C  | p.T246P  | 816 (56%)   | 23 (3%)    | 1.4  | 8.0  |
| <b>CHIP3</b>  | CD34+ PB  | RUNX1  | 21 | RUNX1:chr21:36206787:T/G   | Coding                                         | Missense   | SNV | c.725A>C  | p.H242P  | 956 (66%)   | 23 (2%)    | 1.2  | 6.3  |
| <b>CHIP4</b>  | CD34+ PB  | RUNX1  | 21 | RUNX1:chr21:36206790:T/G   | Coding                                         | Missense   | SNV | c.722A>C  | p.H242P  | 484 (54%)   | 110 (23%)  | 11.4 | 12.8 |
| <b>CHIP3</b>  | CD34+ PB  | RUNX1  | 21 | RUNX1:chr21:36206792:T/G   | Coding                                         | Synonymous | SNV | c.720A>C  | p.P240=  | 788 (54%)   | 647 (82%)  | 41.1 | 27.8 |
| <b>CHIP11</b> | CD34+ PB  | SF3B1  | 2  | SF3B1:chr2:198266834:T/C   | Coding                                         | Missense   | SNV | c.2098A>G | p.K700E  | 9040 (95%)  | 175 (2%)   | 1.0  | 1.6  |
| <b>CHIP11</b> | CD34+ BM  | SF3B1  | 2  | SF3B1:chr2:198266834:T/C   | Coding                                         | Missense   | SNV | c.2098A>G | p.K700E  | 986 (96%)   | 24 (2%)    | 1.3  | 2.1  |
| <b>CHIP1</b>  | CD34- PB  | SF3B1  | 2  | SF3B1:chr2:198267531:A/G   | Coding                                         | Missense   | SNV | c.1826T>C | p.M609T  | 96 (98%)    | 1 (1%)     | 0.5  | 3.1  |
| <b>CHIP1</b>  | CD34- PB  | SF3B1  | 2  | SF3B1:chr2:198267543:C/A   | Coding, splicing                               | Missense   | SNV | c.1814G>T | p.G605V  | 59 (60%)    | 4 (7%)     | 3.4  | 6.9  |
| <b>CHIP1</b>  | CD34+ PB  | TET2   | 4  | TET2:chr4:106155185:C/G    | Coding                                         | Missense   | SNV | c.86C>G   | p.P29R   | 2904 (80%)  | 2706 (93%) | 47.9 | 41.2 |
| <b>CHIP1</b>  | CD138- BM | TET2   | 4  | TET2:chr4:106155185:C/G    | Coding                                         | Missense   | SNV | c.86C>G   | p.P29R   | 6498 (76%)  | 6415 (99%) | 49.4 | 38.4 |
| <b>CHIP7</b>  | CD34+ PB  | TET2   | 4  | TET2:chr4:106155199:C/T    | Coding                                         | Missense   | SNV | c.100C>T  | p.L34F   | 4471 (90%)  | 4312 (96%) | 50.0 | 50.7 |
| <b>CHIP8</b>  | CD34+ BM  | TET2   | 4  | TET2:chr4:106155490:A/G    | Coding                                         | Missense   | SNV | c.391A>G  | p.R131G  | 8071 (63%)  | 137 (2%)   | 0.8  | 2.1  |
| <b>CHIP1</b>  | CD34- PB  | TET2   | 4  | TET2:chr4:106156138:G/A    | Coding                                         | Missense   | SNV | c.1039G>A | p.A347T  | 98 (100%)   | 1 (1%)     | 0.5  | 4.6  |
| <b>CHIP1</b>  | CD34+ PB  | TET2   | 4  | TET2:chr4:106157870:A/G    | Coding                                         | Missense   | SNV | c.2771A>G | p.H924R  | 3229 (89%)  | 3063 (95%) | 49.2 | 50.1 |
| <b>CHIP1</b>  | CD138- BM | TET2   | 4  | TET2:chr4:106157870:A/G    | Coding                                         | Missense   | SNV | c.2771A>G | p.H924R  | 7072 (83%)  | 6900 (98%) | 48.9 | 49.4 |
| <b>CHIP1</b>  | CD34- PB  | TET2   | 4  | TET2:chr4:106158346:C/T    | NMD, coding <sup>(2)</sup>                     | Nonsense   | SNV | c.3247C>T | p.Q1083* | 61 (62%)    | 1 (2%)     | 1.6  | 3.7  |
| <b>CHIP1</b>  | CD34- PB  | TET2   | 4  | TET2:chr4:106158427:A/G    | Coding                                         | Missense   | SNV | c.3328A>G | p.K1110E | 74 (76%)    | 1 (1%)     | 1.4  | 3.0  |
| <b>CHIP9</b>  | CD34+ PB  | TET2   | 4  | TET2:chr4:106162497:G/T    | Coding, splicing, splicing-ACMG <sup>(1)</sup> | Missense   | SNV | c.3411G>T | p.E1137D | 1780 (65%)  | 50 (3%)    | 1.4  | 5.0  |
| <b>CHIP9</b>  | CD34+ PB  | TET2   | 4  | TET2:chr4:106164829:T/G    | Coding                                         | Missense   | SNV | c.3697T>G | p.W1233G | 1428 (52%)  | 56 (4%)    | 2.0  | 3.4  |

|               |              |      |   |                         |        |            |     |           |          |            |           |     |      |
|---------------|--------------|------|---|-------------------------|--------|------------|-----|-----------|----------|------------|-----------|-----|------|
| <b>CHIP9</b>  | CD34+ PB     | TET2 | 4 | TET2:chr4:106180822:T/G | Coding | Missense   | SNV | c.3850T>G | p.S1284A | 2124 (77%) | 221 (10%) | 5.2 | 9.0  |
| <b>CHIP3</b>  | CD34+ PB     | TET2 | 4 | TET2:chr4:106190805:T/G | Coding | Synonymous | SNV | c.4083T>G | p.G1361= | 860 (59%)  | 15 (2%)   | 0.9 | 5.3  |
| <b>CHIP11</b> | BM post ASCT | TET2 | 4 | TET2:chr4:106190805:T/G | Coding | Synonymous | SNV | c.4083T>G | p.G1361= | 3948 (65%) | 436 (11%) | 5.5 | 9.7  |
| <b>CHIP1</b>  | CD138-BM     | TET2 | 4 | TET2:chr4:106190805:T/G | Coding | Synonymous | SNV | c.4083T>G | p.G1361= | 5421 (63%) | 323 (6%)  | 3.0 | 5.8  |
| <b>CHIP14</b> | CD34+ PB     | TET2 | 4 | TET2:chr4:106190805:T/G | Coding | Synonymous | SNV | c.4083T>G | p.G1361= | 3425 (55%) | 216 (6%)  | 3.2 | 7.0  |
| <b>CHIP14</b> | CD34+ BM     | TET2 | 4 | TET2:chr4:106190805:T/G | Coding | Synonymous | SNV | c.4083T>G | p.G1361= | 4372 (58%) | 369 (8%)  | 4.2 | 8.6  |
| <b>CHIP12</b> | CD34+ BM     | TET2 | 4 | TET2:chr4:106190805:T/G | Coding | Synonymous | SNV | c.4083T>G | p.G1361= | 2788 (69%) | 154 (6%)  | 2.8 | 5.7  |
| <b>CHIP11</b> | CD34+ PB     | TET2 | 4 | TET2:chr4:106190805:T/G | Coding | Synonymous | SNV | c.4083T>G | p.G1361= | 6362 (67%) | 105 (2%)  | 0.8 | 2.7  |
| <b>CHIP11</b> | CD34+ BM     | TET2 | 4 | TET2:chr4:106190805:T/G | Coding | Synonymous | SNV | c.4083T>G | p.G1361= | 689 (67%)  | 73 (11%)  | 5.3 | 8.8  |
| <b>CHIP9</b>  | CD34+ PB     | TET2 | 4 | TET2:chr4:106190821:C/T | Coding | Missense   | SNV | c.4099C>T | p.P1367S | 2652 (96%) | 57 (2%)   | 1.1 | 1.8  |
| <b>CHIP9</b>  | CD34+ PB     | TET2 | 4 | TET2:chr4:106190834:T/G | Coding | Missense   | SNV | c.4112T>G | p.V1371G | 2151 (78%) | 138 (6%)  | 3.2 | 8.0  |
| <b>CHIP1</b>  | CD34- PB     | TET2 | 4 | TET2:chr4:106190834:T/G | Coding | Missense   | SNV | c.4112T>G | p.V1371G | 58 (59%)   | 6 (10%)   | 5.2 | 10.8 |
| <b>CHIP8</b>  | CD34+ PB     | TET2 | 4 | TET2:chr4:106196253:A/C | Coding | Missense   | SNV | c.4586A>C | p.Q1529P | 2164 (75%) | 29 (1%)   | 0.7 | 6.8  |
| <b>CHIP12</b> | CD34+ PB     | TET2 | 4 | TET2:chr4:106196253:A/C | Coding | Missense   | SNV | c.4586A>C | p.Q1529P | 3715 (68%) | 67 (2%)   | 0.9 | 6.7  |
| <b>CHIP4</b>  | CD34+ PB     | TET2 | 4 | TET2:chr4:106196283:A/C | Coding | Missense   | SNV | c.4616A>C | p.Q1529P | 594 (66%)  | 10 (2%)   | 0.8 | 5.1  |
| <b>CHIP14</b> | CD34+ BM     | TET2 | 4 | TET2:chr4:106196283:A/C | Coding | Missense   | SNV | c.4616A>C | p.Q1529P | 4033 (54%) | 199 (5%)  | 2.5 | 8.2  |
| <b>CHIP8</b>  | CD34+ PB     | TET2 | 4 | TET2:chr4:106196283:A/C | Coding | Missense   | SNV | c.4616A>C | p.Q1529P | 1742 (60%) | 116 (7%)  | 3.3 | 9.0  |
| <b>CHIP12</b> | CD34+ PB     | TET2 | 4 | TET2:chr4:106196283:A/C | Coding | Missense   | SNV | c.4616A>C | p.Q1529P | 3306 (61%) | 205 (6%)  | 3.1 | 8.7  |
| <b>CHIP12</b> | CD34+ BM     | TET2 | 4 | TET2:chr4:106196283:A/C | Coding | Missense   | SNV | c.4616A>C | p.Q1529P | 2019 (50%) | 62 (3%)   | 1.5 | 6.1  |
| <b>CHIP11</b> | CD34+ PB     | TET2 | 4 | TET2:chr4:106196283:A/C | Coding | Missense   | SNV | c.4616A>C | p.Q1529P | 5092 (54%) | 163 (3%)  | 1.6 | 6.6  |
| <b>CHIP11</b> | CD34+ PB     | TET2 | 4 | TET2:chr4:106196283:A/C | Coding | Missense   | SNV | c.4616A>C | p.Q1529P | 627 (61%)  | 35 (6%)   | 2.8 | 8.1  |
| <b>CHIP9</b>  | CD34+ PB     | TET2 | 4 | TET2:chr4:106196792:T/C | Coding | Missense   | SNV | c.5125T>C | p.C1709R | 1810 (66%) | 52 (3%)   | 1.4 | 5.1  |
| <b>CHIP6</b>  | CD34+ PB     | TET2 | 4 | TET2:chr4:106196792:T/C | Coding | Missense   | SNV | c.5125T>C | p.C1709R | 2437 (83%) | 67 (3%)   | 1.4 | 2.6  |
| <b>CHIP7</b>  | CD34+ PB     | TET2 | 4 | TET2:chr4:106196792:T/C | Coding | Missense   | SNV | c.5125T>C | p.C1709R | 3838 (77%) | 136 (4%)  | 1.8 | 3.0  |
| <b>CHIP4</b>  | CD34+ PB     | TET2 | 4 | TET2:chr4:106196792:T/C | Coding | Missense   | SNV | c.5125T>C | p.C1709R | 759 (84%)  | 16 (2%)   | 1.1 | 2.7  |
| <b>CHIP2</b>  | CD34+ PB     | TET2 | 4 | TET2:chr4:106196792:T/C | Coding | Missense   | SNV | c.5125T>C | p.C1709R | 7423 (61%) | 158 (2%)  | 1.1 | 2.7  |
| <b>CHIP11</b> | BM post ASCT | TET2 | 4 | TET2:chr4:106196792:T/C | Coding | Missense   | SNV | c.5125T>C | p.C1709R | 4934 (81%) | 94 (2%)   | 1.0 | 2.8  |
| <b>CHIP1</b>  | CD34+ PB     | TET2 | 4 | TET2:chr4:106196792:T/C | Coding | Missense   | SNV | c.5125T>C | p.C1709R | 2503 (69%) | 126 (5%)  | 2.5 | 3.9  |



|               |          |      |    |                         |        |            |     |           |          |             |             |       |      |
|---------------|----------|------|----|-------------------------|--------|------------|-----|-----------|----------|-------------|-------------|-------|------|
| <b>CHIP1</b>  | CD138-BM | TET2 | 4  | TET2:chr4:106196792:T/C | Coding | Missense   | SNV | c.5125T>C | p.C1709R | 5562 (65%)  | 195 (4%)    | 1.8   | 3.3  |
| <b>CHIP14</b> | CD34+ PB | TET2 | 4  | TET2:chr4:106196792:T/C | Coding | Missense   | SNV | c.5125T>C | p.C1709R | 4542 (73%)  | 174 (4%)    | 1.9   | 2.8  |
| <b>CHIP14</b> | CD34+ BM | TET2 | 4  | TET2:chr4:106196792:T/C | Coding | Missense   | SNV | c.5125T>C | p.C1709R | 5117 (68%)  | 256 (5%)    | 2.5   | 3.4  |
| <b>CHIP8</b>  | CD34+ PB | TET2 | 4  | TET2:chr4:106196792:T/C | Coding | Missense   | SNV | c.5125T>C | p.C1709R | 2431 (84%)  | 76 (3%)     | 1.6   | 3.0  |
| <b>CHIP8</b>  | CD34+ BM | TET2 | 4  | TET2:chr4:106196792:T/C | Coding | Missense   | SNV | c.5125T>C | p.C1709R | 7166 (56%)  | 169 (2%)    | 1.2   | 3.5  |
| <b>CHIP12</b> | CD34+ PB | TET2 | 4  | TET2:chr4:106196792:T/C | Coding | Missense   | SNV | c.5125T>C | p.C1709R | 4032 (74%)  | 148 (4%)    | 1.8   | 3.2  |
| <b>CHIP12</b> | CD34+ BM | TET2 | 4  | TET2:chr4:106196792:T/C | Coding | Missense   | SNV | c.5125T>C | p.C1709R | 3276 (81%)  | 95 (3%)     | 1.4   | 2.8  |
| <b>CHIP11</b> | CD34+ PB | TET2 | 4  | TET2:chr4:106196792:T/C | Coding | Missense   | SNV | c.5125T>C | p.C1709R | 5944 (63%)  | 483 (8%)    | 4.1   | 4.4  |
| <b>CHIP11</b> | CD34+ BM | TET2 | 4  | TET2:chr4:106196792:T/C | Coding | Missense   | SNV | c.5125T>C | p.C1709R | 699 (68%)   | 79 (11%)    | 5.7   | 5.2  |
| <b>CHIP6</b>  | CD34+ PB | TET2 | 4  | TET2:chr4:106196829:T/G | Coding | Missense   | SNV | c.5162T>G | p.L1721W | 2936 (100%) | 2936 (100%) | 99.9  | 99.7 |
| <b>CHIP7</b>  | CD34+ PB | TET2 | 4  | TET2:chr4:106196829:T/G | Coding | Missense   | SNV | c.5162T>G | p.L1721W | 4667 (94%)  | 4479 (96%)  | 50.1  | 49.6 |
| <b>CHIP4</b>  | CD34+ PB | TET2 | 4  | TET2:chr4:106196829:T/G | Coding | Missense   | SNV | c.5162T>G | p.L1721W | 875 (97%)   | 832 (95%)   | 49.7  | 50.8 |
| <b>CHIP3</b>  | CD34+ PB | TET2 | 4  | TET2:chr4:106196829:T/G | Coding | Missense   | SNV | c.5162T>G | p.L1721W | 1406 (97%)  | 1345 (96%)  | 50.6  | 51.1 |
| <b>CHIP2</b>  | CD34+ PB | TET2 | 4  | TET2:chr4:106196829:T/G | Coding | Missense   | SNV | c.5162T>G | p.L1721W | 11925 (98%) | 11747 (99%) | 50.0  | 49.9 |
| <b>CHIP14</b> | CD34+ PB | TET2 | 4  | TET2:chr4:106196829:T/G | Coding | Missense   | SNV | c.5162T>G | p.L1721W | 6091 (98%)  | 6091 (100%) | 99.9  | 99.5 |
| <b>CHIP14</b> | CD34+ BM | TET2 | 4  | TET2:chr4:106196829:T/G | Coding | Missense   | SNV | c.5162T>G | p.L1721W | 7448 (99%)  | 7448 (100%) | 100.0 | 99.5 |
| <b>CHIP7</b>  | CD34+ PB | TET2 | 4  | TET2:chr4:106197000:A/G | Coding | Missense   | SNV | c.5333A>G | p.H1778R | 4688 (95%)  | 4495 (96%)  | 49.9  | 52.7 |
| <b>CHIP1</b>  | CD34+ PB | TET2 | 4  | TET2:chr4:106197000:A/G | Coding | Missense   | SNV | c.5333A>G | p.H1778R | 3435 (95%)  | 3305 (96%)  | 50.0  | 52.9 |
| <b>CHIP1</b>  | CD138-BM | TET2 | 4  | TET2:chr4:106197000:A/G | Coding | Missense   | SNV | c.5333A>G | p.H1778R | 8280 (97%)  | 8253 (100%) | 50.1  | 51.1 |
| <b>CHIP9</b>  | CD34+ PB | TET2 | 4  | TET2:chr4:106197002:G/A | Coding | Missense   | SNV | c.5335G>A | p.A1779T | 1418 (51%)  | 50 (4%)     | 1.8   | 6.1  |
| <b>CHIP1</b>  | CD34+ PB | TET2 | 4  | TET2:chr4:106197139:T/G | Coding | Synonymous | SNV | c.5472T>G | p.G1824= | 53 (54%)    | 11 (21%)    | 10.4  | 7.9  |
| <b>CHIP14</b> | CD34+ BM | TET2 | 4  | TET2:chr4:106197139:T/G | Coding | Synonymous | SNV | c.5472T>G | p.G1824= | 4093 (54%)  | 77 (2%)     | 0.9   | 7.9  |
| <b>CHIP1</b>  | CD34- PB | TET2 | 4  | TET2:chr4:106197172:T/G | Coding | Synonymous | SNV | c.5505T>G | p.G1835= | 49 (50%)    | 19 (39%)    | 19.4  | 12.3 |
| <b>CHIP8</b>  | CD34+ PB | TET2 | 4  | TET2:chr4:106197172:T/G | Coding | Synonymous | SNV | c.5505T>G | p.G1835= | 1561 (54%)  | 30 (2%)     | 1.0   | 9.1  |
| <b>CHIP9</b>  | CD34+ PB | TET2 | 4  | TET2:chr4:106197204:T/G | Coding | Missense   | SNV | c.5537T>G | p.V1846G | 1388 (50%)  | 42 (3%)     | 1.5   | 3.8  |
| <b>CHIP9</b>  | CD34+ PB | TP53 | 17 | TP53:chr17:7574022:A/C  | Coding | Synonymous | SNV | c.888T>G  | p.R296=  | 1619 (59%)  | 75 (5%)     | 2.3   | 6.7  |

|               |              |       |    |                          |                                                   |            |          |                |             |            |                |       |      |
|---------------|--------------|-------|----|--------------------------|---------------------------------------------------|------------|----------|----------------|-------------|------------|----------------|-------|------|
| <b>CHIP9</b>  | CD34+ PB     | TP53  | 17 | TP53:chr17:7574028:A/C   | Coding, splicing                                  | Synonymous | SNV      | c.882T>G       | p.R294=     | 2064 (75%) | 73 (4%)        | 1.8   | 7.5  |
| <b>CHIP9</b>  | CD34+ PB     | TP53  | 17 | TP53:chr17:7576896:T/G   | Coding                                            | Missense   | SNV      | c.833A>C       | p.Q278P     | 1403 (51%) | 69 (5%)        | 2.5   | 5.4  |
| <b>CHIP1</b>  | CD138-<br>BM | TP53  | 17 | TP53:chr17:7577099:C/G   | Coding                                            | Missense   | SNV      | c.722G>C       | p.R241T     | 7576 (89%) | 243 (3%)       | 1.6   | 2.2  |
| <b>CHIP1</b>  | CD138-<br>BM | TP53  | 17 | TP53:chr17:7577127:C/T   | Coding                                            | Missense   | SNV      | c.694G>A       | p.E232K     | 7819 (92%) | 109 (1%)       | 0.7   | 2.0  |
| <b>CHIP9</b>  | CD34+ PB     | TP53  | 17 | TP53:chr17:7577500:T/G   | Coding, splicing,<br>splicing-ACMG <sup>(1)</sup> | Missense   | SNV      | c.664A>C       | p.S222R     | 2151 (78%) | 39 (2%)        | 0.9   | 5.4  |
| <b>CHIP8</b>  | CD34+ PB     | TP53  | 17 | TP53:chr17:7578210:T/C   | Coding                                            | Synonymous | SNV      | c.522A>G       | p.R174=     | 2442 (85%) | 2293<br>(94%)  | 50.2  | 51.6 |
| <b>CHIP9</b>  | CD34+ PB     | TP53  | 17 | TP53:chr17:7578434:A/C   | Coding                                            | Missense   | SNV      | c.379T>G       | p.S127A     | 1441 (52%) | 33 (2%)        | 1.1   | 4.3  |
| <b>CHIP1</b>  | CD34- PB     | TP53  | 17 | TP53:chr17:7578460:A/G   | Coding                                            | Missense   | SNV      | c.353T>C       | p.V118A     | 54 (55%)   | 1 (2%)         | 0.9   | 1.6  |
| <b>CHIP8</b>  | CD34+ PB     | TP53  | 17 | TP53:chr17:7578480:T/G   | Coding                                            | Synonymous | SNV      | c.333A>C       | p.T111=     | 1639 (57%) | 38 (2%)        | 1.2   | 7.5  |
| <b>CHIP1</b>  | CD138-<br>BM | TP53  | 17 | TP53:chr17:7578508:C/T   | Coding                                            | Missense   | SNV      | c.305G>A       | p.C102Y     | 6029 (71%) | 91 (2%)        | 0.8   | 2.3  |
| <b>CHIP1</b>  | CD34+ PB     | U2AF1 | 21 | U2AF1:chr21:44514601:C/T | Coding                                            | Synonymous | SNV      | c.555G>A       | p.L185=     | 3246 (90%) | 3045<br>(94%)  | 49.6  | 50.5 |
| <b>CHIP1</b>  | CD138-<br>BM | U2AF1 | 21 | U2AF1:chr21:44514601:C/T | Coding                                            | Synonymous | SNV      | c.555G>A       | p.L185=     | 7550 (88%) | 7480<br>(99%)  | 49.9  | 50.3 |
| <b>CHIP1</b>  | CD34- PB     | U2AF1 | 21 | U2AF1:chr21:44514601:C/T | Coding                                            | Synonymous | SNV      | c.555G>A       | p.L185=     | 86 (88%)   | 78 (91%)       | 45.9  | 45.2 |
| <b>CHIP1</b>  | CD34- PB     | WT1   | 11 | WT1:chr11:32413520:G/A   | Coding, splicing                                  | Missense   | SNV      | c.1445C>T      | p.T482I     | 97 (99%)   | 1 (1%)         | 0.5   | 4.0  |
| <b>CHIP1</b>  | CD34- PB     | WT1   | 11 | WT1:chr11:32413605:TCA/T | NMD, coding,<br>splicing <sup>(2)</sup>           | Frameshift | Deletion | c.1358_1359del | p.V453Efs*6 | 97 (99%)   | 2 (2%)         | 1.0   | 2.0  |
| <b>CHIP9</b>  | CD34+ PB     | WT1   | 11 | WT1:chr11:32417899:T/G   | Coding                                            | Missense   | SNV      | c.1168A>C      | p.T390P     | 1506 (55%) | 85 (6%)        | 2.8   | 5.9  |
| <b>CHIP7</b>  | CD34+ PB     | WT1   | 11 | WT1:chr11:32417945:T/C   | Coding, splicing                                  | Synonymous | SNV      | c.1122A>G      | p.R374=     | 4583 (92%) | 4496<br>(98%)  | 50.1  | 50.6 |
| <b>CHIP1</b>  | CD34+ PB     | WT1   | 11 | WT1:chr11:32417945:T/C   | Coding, splicing                                  | Synonymous | SNV      | c.1122A>G      | p.R374=     | 3365 (93%) | 3300<br>(98%)  | 50.1  | 50.4 |
| <b>CHIP1</b>  | CD138-<br>BM | WT1   | 11 | WT1:chr11:32417945:T/C   | Coding, splicing                                  | Synonymous | SNV      | c.1122A>G      | p.R374=     | 8074 (94%) | 8062<br>(100%) | 50.0  | 49.7 |
| <b>CHIP1</b>  | CD34- PB     | WT1   | 11 | WT1:chr11:32417945:T/C   | Coding, splicing                                  | Synonymous | SNV      | c.1122A>G      | p.R374=     | 79 (81%)   | 76 (96%)       | 48.7  | 40.8 |
| <b>CHIP14</b> | CD34+ PB     | WT1   | 11 | WT1:chr11:32417945:T/C   | Coding, splicing                                  | Synonymous | SNV      | c.1122A>G      | p.R374=     | 5225 (84%) | 5225<br>(100%) | 100.0 | 99.9 |
| <b>CHIP14</b> | CD34+<br>BM  | WT1   | 11 | WT1:chr11:32417945:T/C   | Coding, splicing                                  | Synonymous | SNV      | c.1122A>G      | p.R374=     | 7198 (96%) | 7198<br>(100%) | 99.9  | 99.9 |
| <b>CHIP8</b>  | CD34+ PB     | WT1   | 11 | WT1:chr11:32417945:T/C   | Coding, splicing                                  | Synonymous | SNV      | c.1122A>G      | p.R374=     | 2630 (91%) | 2534<br>(96%)  | 49.9  | 50.7 |
| <b>CHIP8</b>  | CD34+<br>BM  | WT1   | 11 | WT1:chr11:32417945:T/C   | Coding, splicing                                  | Synonymous | SNV      | c.1122A>G      | p.R374=     | 9382 (74%) | 9329<br>(99%)  | 50.0  | 49.2 |

<sup>(1)</sup> According to the American College of Medical Genetics and Genomics-Association for Molecular Pathology (ACMG-AMP) interpretation guidelines

<sup>(2)</sup> Nonsense-mediated decay (NMD)

**Supplementary Table S3. Called pathogenic somatic Variants.** All pathogenic somatic coding variants identified in all samples analyzed (n=19). SNV=Single Nucleotide Variant.

| Sample | Sample Type  | Gene   | Chromosome | Variant                  | Function                                       | Coding Impact | Variant Type | cDNA        | Protein Change | Genotyped Cells | Mutated Cells | VAF by cell count (%) | VAF by read count (%) |
|--------|--------------|--------|------------|--------------------------|------------------------------------------------|---------------|--------------|-------------|----------------|-----------------|---------------|-----------------------|-----------------------|
| CHIP11 | BM post ASCT | DNMT3A | 2          | DNMT3A:chr2:25457242:C/T | Coding                                         | Missense      | SNV          | c.2645G>A   | p.R882H        | 5376 (88%)      | 3985 (74%)    | 39.6                  | 38.5                  |
| CHIP11 | CD34+ PB     | DNMT3A | 2          | DNMT3A:chr2:25457242:C/T | Coding                                         | Missense      | SNV          | c.2645G>A   | p.R882H        | 6843 (72%)      | 5312 (78%)    | 41.3                  | 37.1                  |
| CHIP11 | CD34+ BM     | DNMT3A | 2          | DNMT3A:chr2:25457242:C/T | Coding                                         | Missense      | SNV          | c.2645G>A   | p.R882H        | 837 (81%)       | 521 (62%)     | 35.2                  | 34.5                  |
| CHIP9  | CD34+ PB     | DNMT3A | 2          | DNMT3A:chr2:25457246:T/G | Coding                                         | Missense      | SNV          | c.2641A>C   | p.S881R        | 1661 (60%)      | 320 (19%)     | 9.6                   | 13.4                  |
| CHIP1  | CD34- PB     | DNMT3A | 2          | DNMT3A:chr2:25462086:T/G | Intronic, splicing, NMD, coding <sup>(2)</sup> |               | SNV          | c.2323-2A>C |                | 61 (62%)        | 5 (8%)        | 4.1                   | 4.6                   |
| CHIP7  | CD34+ PB     | DNMT3A | 2          | DNMT3A:chr2:25463182:G/A |                                                | Nonsense      | SNV          | c.2311C>T   | p.R771*        | 4758 (96%)      | 134 (3%)      | 1.5                   | 1.9                   |
| CHIP14 | CD34+ PB     | DNMT3A | 2          | DNMT3A:chr2:25463248:G/A | Coding                                         | Missense      | SNV          | c.2245C>T   | p.R749C        | 4973 (80%)      | 121 (2%)      | 1.2                   | 3.3                   |
| CHIP14 | CD34+ BM     | DNMT3A | 2          | DNMT3A:chr2:25463248:G/A | Coding                                         | Missense      | SNV          | c.2245C>T   | p.R749C        | 6361 (85%)      | 100 (2%)      | 0.8                   | 3.0                   |
| CHIP1  | CD138- BM    | EZH2   | 7          | EZH2:chr7:148512080:T/G  | Coding                                         | Missense      | SNV          | c.1598A>C   | p.Q533P        | 5084 (60%)      | 182 (4%)      | 1.8                   | 4.8                   |
| CHIP1  | CD34+ PB     | GATA2  | 3          | GATA2:chr3:128200690:G/A | Coding                                         | Missense      | SNV          | c.1115C>T   | p.A372V        | 2549 (70%)      | 51 (2%)       | 2.4                   | 1.6                   |
| CHIP1  | CD138- BM    | GATA2  | 3          | GATA2:chr3:128200690:G/A | Coding                                         | Missense      | SNV          | c.1115C>T   | p.A372V        | 5010 (59%)      | 127 (3%)      | 1.3                   | 2.6                   |
| CHIP9  | CD34+ PB     | KIT    | 4          | KIT:chr4:55599336:C/A    | Coding                                         | Missense      | SNV          | c.2462C>A   | p.S821Y        | 1463 (53%)      | 926 (63%)     | 31.6                  | 23.8                  |
| CHIP12 | CD34+ PB     | KIT    | 4          | KIT:chr4:55599336:C/A    | Coding                                         | Missense      | SNV          | c.2462C>A   | p.S821Y        | 3424 (63%)      | 533 (16%)     | 7.8                   | 14.4                  |
| CHIP12 | CD34+ BM     | KIT    | 4          | KIT:chr4:55599336:C/A    | Coding                                         | Missense      | SNV          | c.2462C>A   | p.S821Y        | 2500 (62%)      | 185 (7%)      | 3.7                   | 7.4                   |
| CHIP11 | CD34+ BM     | NRAS   | 1          | NRAS:chr1:115256529:T/C  | Coding                                         | Missense      | SNV          | c.182A>G    | p.Q61R         | 945 (92%)       | 19 (2%)       | 1.1                   | 2.3                   |
| CHIP11 | CD34+ PB     | SF3B1  | 2          | SF3B1:chr2:198266834:T/C | Coding                                         | Missense      | SNV          | c.2098A>G   | p.K700E        | 9040 (95%)      | 175 (2%)      | 1.0                   | 1.6                   |
| CHIP11 | CD34+ BM     | SF3B1  | 2          | SF3B1:chr2:198266834:T/C | Coding                                         | Missense      | SNV          | c.2098A>G   | p.K700E        | 986 (96%)       | 24 (2%)       | 1.3                   | 2.1                   |
| CHIP14 | CD34+ BM     | TET2   | 4          | TET2:chr4:106196283:A/C  | Coding                                         | Missense      | SNV          | c.4616A>C   | p.Q1529P       | 4033 (54%)      | 199 (5%)      | 2.5                   | 8.2                   |

<sup>(1)</sup> According to the American College of Medical Genetics and Genomics-Association for Molecular Pathology (ACMG-AMP) interpretation guidelines

<sup>(2)</sup> Nonsense-mediated decay (NMD)

**Supplementary Table S4. Patients cytogenic characteristics.**

|                        | <b>Total (n=12)</b> | <b>Presence of CHIP<br/>mutation (n=6)</b> | <b>Absence of CHIP<br/>mutation (n=6)</b> |
|------------------------|---------------------|--------------------------------------------|-------------------------------------------|
| <b><i>t(4;14)</i></b>  |                     |                                            |                                           |
| <i>Yes</i>             | 2 (17%)             | 1 (17%)                                    | 1 (17%)                                   |
| <i>No</i>              | 8 (66%)             | 4 (66%)                                    | 4 (66%)                                   |
| <i>Not available</i>   | 2 (17%)             | 1 (17%)                                    | 1 (17%)                                   |
| <b><i>t(11;14)</i></b> |                     |                                            |                                           |
| <i>Yes</i>             | 3 (25%)             | 3 (50%)                                    | 0                                         |
| <i>No</i>              | 4 (33%)             | 2 (33%)                                    | 2 (33%)                                   |
| <i>Not available</i>   | 5 (42%)             | 1 (17%)                                    | 4 (67%)                                   |
| <b><i>t(14;16)</i></b> |                     |                                            |                                           |
| <i>Yes</i>             | 0                   | 0                                          | 0                                         |
| <i>No</i>              | 10 (83%)            | 5 (83%)                                    | 5 (83%)                                   |
| <i>Not available</i>   | 2 (17%)             | 1 (17%)                                    | 1 (17%)                                   |
| <b><i>t(14;20)</i></b> |                     |                                            |                                           |
| <i>Yes</i>             | 0                   | 0                                          | 0                                         |
| <i>No</i>              | 7 (58%)             | 5 (83%)                                    | 2 (33%)                                   |
| <i>Not available</i>   | 5 (42%)             | 1 (17%)                                    | 4 (67%)                                   |
| <b><i>Del17p</i></b>   |                     |                                            |                                           |
| <i>Yes</i>             | 0                   | 0                                          | 0                                         |
| <i>No</i>              | 10 (83%)            | 5 (83%)                                    | 5 (83%)                                   |
| <i>Not available</i>   | 2 (17%)             | 1 (17%)                                    | 1 (17%)                                   |
| <b><i>Ampl1q</i></b>   |                     |                                            |                                           |
| <i>Yes</i>             | 7 (58%)             | 3 (50%)                                    | 4 (66%)                                   |
| <i>No</i>              | 3 (25%)             | 2 (33%)                                    | 1 (17%)                                   |
| <i>Not available</i>   | 2 (17%)             | 1 (17%)                                    | 1 (17%)                                   |
| <b><i>Del1p</i></b>    |                     |                                            |                                           |
| <i>Yes</i>             | 0                   | 0                                          | 0                                         |
| <i>No</i>              | 9 (75%)             | 5 (83%)                                    | 4 (67%)                                   |
| <i>Not available</i>   | 3 (25%)             | 1 (17%)                                    | 2 (33%)                                   |

Patients' cytogenetic characteristics were assessed using the standard technique of Fluorescence in situ Hybridization (FISH).
